# Supplementary material for: Morphology of clusters of attractive dry and wet self-propelled spherical particle suspensions
Source: Royal Society of Chemistry journal article supplement (doi:10.1039/c6sm01752e), 2016-12-14
Supplement: c6sm01752e1.pdf [file c6sm01752e1.pdf]

## Supporting Information

F. Alarcón, C. Valeriani and I. Pagonabarra

**Descriptions of Movies.** We show one movie of the ABP system whose ratio between attraction and self-propulsion corresponds to  $\xi=1.8$  (panel a) Fig. 3). The time between two frames is  $5\tau$  (being  $\tau$  the time unit).

We also show six movies of the squirmers that correspond to the cases shown in panel c) to h) of Fig. 3. The time between two frames is  $1.45 t_0$  (being  $t_0$  the time that a squirmer travels its own size).

Movies are made showing one third of the simulation box in order to observe the dynamics of the systems in a more detailed way.

| $\xi$    | $\beta$ | File name          |
|----------|---------|--------------------|
| 1.8      | N/A     | xi_1.8ABP.avi      |
| 1.0      | 0.5     | xi_1_0_bp0_5.avi   |
| 1.0      | -0.5    | xi_1_0_bn0_5.avi   |
| 5.0      | 0.5     | xi_5_bp0_5.avi     |
| 5.0      | -0.5    | xi_5_bn0_5.avi     |
| $\infty$ | 0.5     | xi_infty_bp0_5.avi |
| $\infty$ | -0.5    | xi_infty_bn0_5.avi |
